# Supplementary material for: Bridging and terminal hydroxyl groups of Zr(OH)4 as active sites for the ultraselective transformation of biomass-based alcohols
Source: Royal Society of Chemistry journal article supplement (doi:10.1039/d3cy01477k), 2024-01-01
Supplement: d3cy01477k1.pdf [file d3cy01477k1.pdf]

## Supplementary Information

### **Bridging and terminal hydroxyl groups of $\text{Zr}(\text{OH})_4$ as active sites for the ultraselective transformation of biomass-based alcohols**

Xiaoqi Tang, Ganping Wang, Jiaheng Qin, Jie Song, Jiajun Tan, Linkun Dong, Weiwen Mao, Tong Li, Jian Fang\*, Yu Long\*

State Key Laboratory of Applied Organic Chemistry (SKLAOC), Gansu Provincial Engineering Laboratory for Chemical Catalysis, College of Chemistry and Chemical Engineering, Lanzhou University, Lanzhou 730000, P. R. China.

\* Corresponding author:

E-mail address: longyu@lzu.edu.cn (Yu Long), fangj@lzu.edu.cn (Jian Fang)

#### **Table of Figures**

|                        |    |
|------------------------|----|
| <b>Figure S1</b> ..... | S4 |
| <b>Figure S2</b> ..... | S5 |
| <b>Figure S3</b> ..... | S5 |
| <b>Figure S4</b> ..... | S6 |
| <b>Figure S5</b> ..... | S6 |
| <b>Figure S6</b> ..... | S7 |

Submitted to  
***Catal. Sci. Technol.***

## Experimental

### 1. Materials

All commercially available reagents and solvents were used without any further purification.

### 2. Preparation of Catalysts

Zr(OH)<sub>4</sub> was prepared by placing commercially available Zirconium hydroxide powder in a drying oven at 150 °C for 12 h. Zr(OH)<sub>4</sub>-H<sub>2</sub>SO<sub>4</sub> was prepared by stirring Zr(OH)<sub>4</sub> and 0.5M H<sub>2</sub>SO<sub>4</sub> solution for 2 h at room temperature, then centrifuging and washing with deionized water, the solid was drying at 150 °C for 12 h. Zr(OH)<sub>4</sub>-NH<sub>3</sub> was prepared by treating Zr(OH)<sub>4</sub> with pure ammonia gas at 150 °C for 5 h in vertical tubular furnace. Zr(OH)<sub>4</sub>-C<sub>3</sub>H<sub>9</sub>ClSi was prepared by treating Zr(OH)<sub>4</sub> with trimethylchlorosilane in toluene solvent under N<sub>2</sub> atmosphere at 115 °C for 24 h, then it was placed in a vacuum drying oven at 60 °C for 12 h.

### 3. Characterizations of Catalysts

The crystallographic structure of the solid samples was investigated at room temperature using powder X-ray diffraction (XRD, Rigaku D/max-2400 diffractometer, Cu-K $\alpha$  radiation,) at a scanning rate of 30°·min<sup>-1</sup>. The morphology, elemental analysis mapping of the solid samples was examined using transmission electron microscopy (TEM, Tecnai G2 F30, 300 kV), and high-resolution transmission electron microscopy (HRTEM/EDX, Tecnai G2 F30, 300 kV). Raman spectra were recorded on an in Via Renishaw confocal microscope with 633 nm laser excitation. Chemical bonding information of the samples was acquired with Fourier transform infrared spectroscopy (FT-IR, Nicolet NEXUS 670) using the potassium bromide (KBr) pellet technique. To make the KBr pellets, about 1 mg of sample was diluted with 100 mg of KBr powders. Each FTIR spectrum was collected after 32 scans with a resolution of 4 cm<sup>-1</sup> from 400 to 4000 cm<sup>-1</sup>. X-ray photoelectron spectroscopy (XPS) was performed on the PHI-5702 instruments with an Mg anode (Mg K $\alpha$  hu = 1253.6 eV) at a base pressure of 5×10<sup>-8</sup> mbar. The revision of the binding energies (BE) was implemented with the C1s peak

of extraneous C at 284.6 eV. Solid-state  $^1\text{H}$  MAS NMR spectra were obtained on a Bruker AVANCE II 400 WB spectrometer. The spinning speed was 10 kHz. All chemical shifts are referenced to TMS externally.  $^1\text{H}$  MAS NMR signal is collected using a pulse width of 3  $\mu\text{s}$ . Thirty-two scans were sufficed to provide a satisfactory signal-to-noise ratio in the NMR spectrum. Thermogravimetric analysis (TGA) was performed on TGA TA-Q50 (METTLER TOLEDO). Inductively coupled plasma-atomic emission spectroscopy (ICP-AES, Optima-4300DV) was used to measure Zr leaching in the filtrate after catalyst recovery.

#### 4. Test of Catalytic Activity

In a typical experiment, catalyst, corresponding alcohol substrate and solvent were added into a stainless-steel reactor, followed by pressurizing it to required molecular oxygen or nitrogen pressure. Then the mixture was stirred and heated to setting temperature for a desired period of time. After the completion of the reaction, the autoclave was cooled to room temperature. The remaining oxygen was discharged and the sample was removed from the autoclave. Subsequently, the crude mixture was diluted with ethyl acetate and filtered, the product mixture was identified by GC and GC-MS.

In the recycle experiment, the catalyst was collected by centrifugation, and exhaustively washed with ethyl acetate and ethanol. Then it was placed in a drying oven at 60  $^{\circ}\text{C}$  for 12 h. The spent catalyst was used for the next run under the same conditions. Other cycles were repeated with the same procedure.

#### 5. Computational Details

Gaussian 09 package<sup>1</sup> was used in geometry optimization and electronic structure calculations of 1-phenylethanol,  $\text{Zr}(\text{OH})_4$  cluster and the adsorption complex formed between  $\text{Zr}(\text{OH})_4$  cluster and 1-phenylethano. A dispersion energy correction was added to the hybrid B3LYP exchange correlation functional via the DFT-D3 model.<sup>2,3</sup> For H, C and O atoms, the 6-31g (d, p) basis set<sup>4</sup> was used, while for Zr atom, the LANL2DZ basis set<sup>5</sup> was used. Berny algorithm<sup>6</sup> was used to search transition-state (TS). Vibrational frequency calculation was performed at the same level of theory to

confirm that each reaction intermediates has no imaginary frequency, while each transition-state has only one imaginary frequency.

### Supporting results

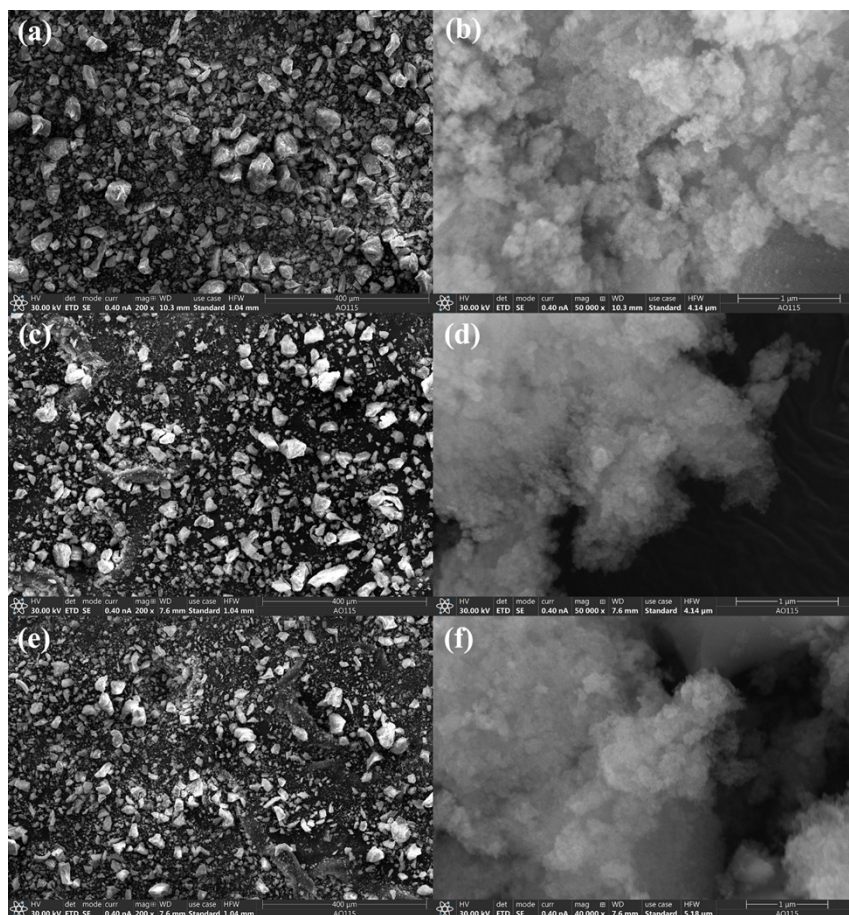

**Figure S1.** Scanning electron microscope (SEM) figures of fresh  $\text{Zr(OH)}_4$  (a, b) and six times reused  $\text{Zr(OH)}_4$  after oxidative dehydrogenation (c, d) and dehydration reaction (e, f).

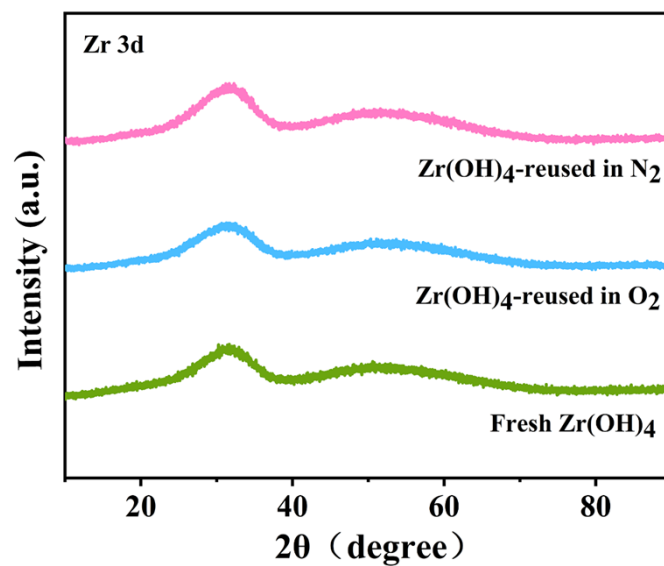

**Figure S2.** XRD patterns of fresh  $\text{Zr(OH)}_4$  and six times reused  $\text{Zr(OH)}_4$  after oxidative dehydrogenation and dehydration reaction.

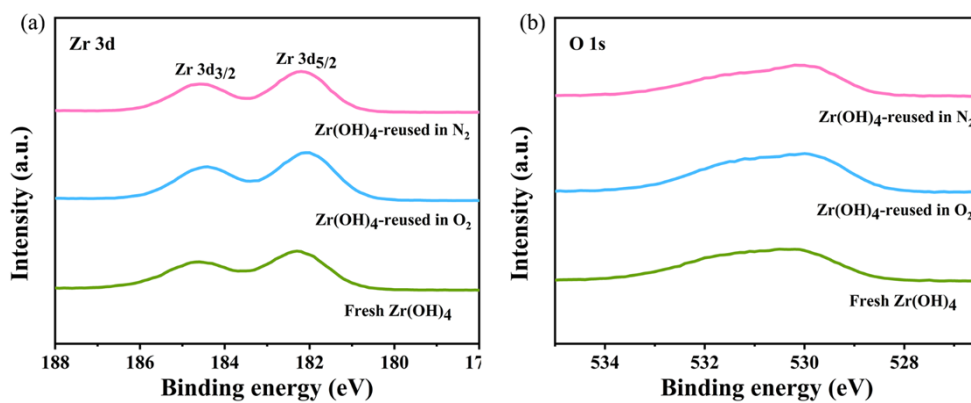

**Figure S3.** Zr 3d (a) and (b) O 1s XPS spectra of fresh  $\text{Zr(OH)}_4$  and six times reused  $\text{Zr(OH)}_4$  after oxidative dehydrogenation and dehydration reaction.

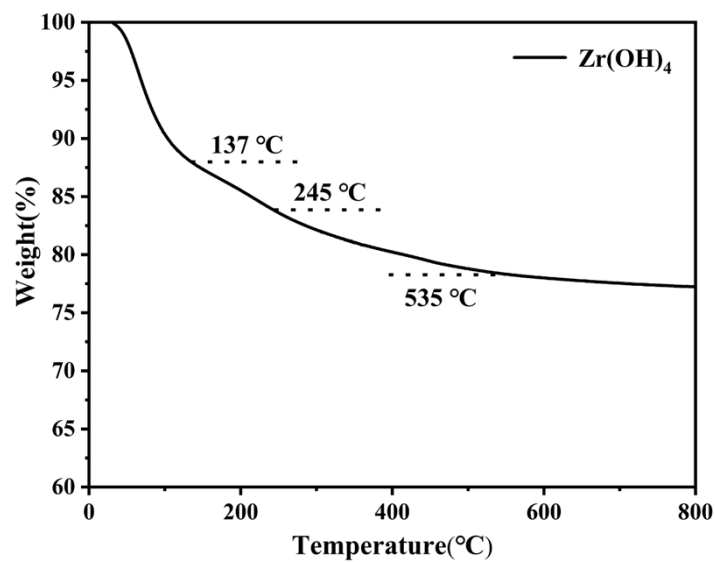

**Figure S4.** TGA curve of the Zr(OH)<sub>4</sub> catalyst.

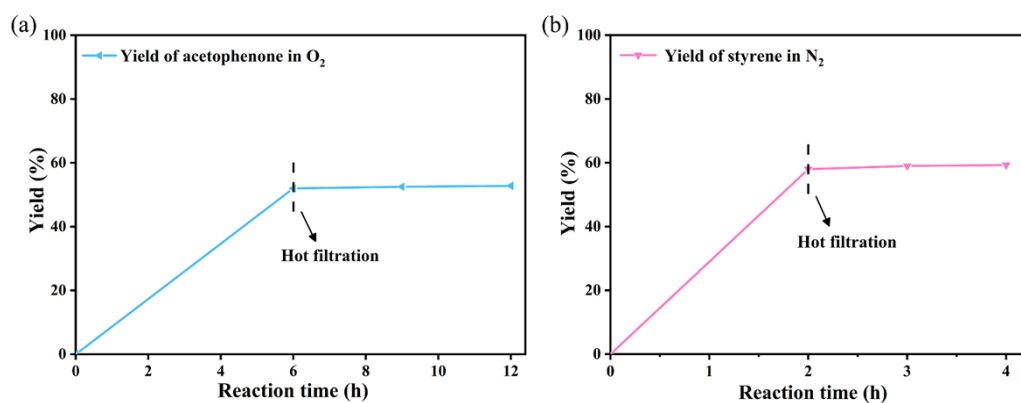

**Figure S5.** Hot filtration experiments of Zr(OH)<sub>4</sub> by continuing the reaction after filtration of the catalyst. Reaction conditions: (a) 1-phenylethanol (1 mmol), Zr(OH)<sub>4</sub> (50 mg), solvent (toluene 5 mL), 800 rpm, 150 °C, 1 MPa O<sub>2</sub>. (b) 1-phenylethanol (1 mmol), Zr(OH)<sub>4</sub> (50 mg), solvent (dichloromethane 5 mL), 800 rpm, 150 °C, 1 MPa N<sub>2</sub>.

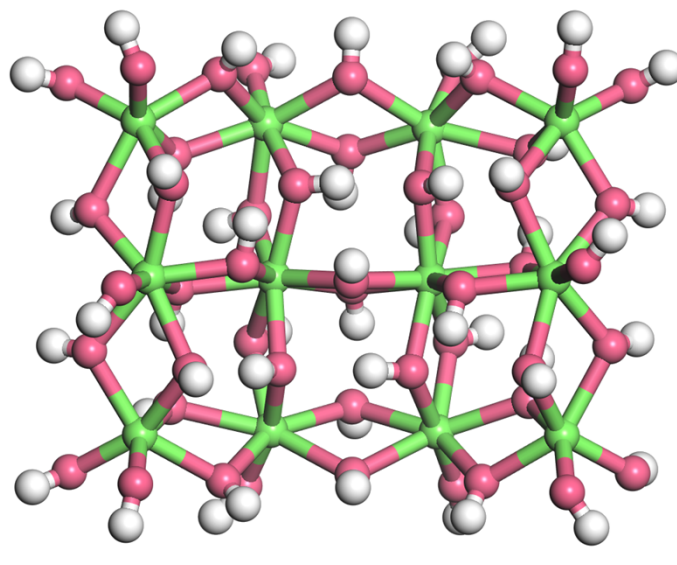

**Figure S6.** The optimized structural model of  $\text{Zr}(\text{OH})_4$ .

The detail optimized Cartesian coordinates (in Å) of stationary states are listed as following:

**Structural model :**

|    |             |             |             |
|----|-------------|-------------|-------------|
| Zr | 4.73330000  | 3.52100000  | 0.69680000  |
| Zr | 1.75900000  | 3.37920000  | -1.44260000 |
| Zr | -1.91570000 | 3.46470000  | -1.39520000 |
| Zr | -4.77420000 | 3.52770000  | 0.86520000  |
| Zr | 4.54160000  | 0.00410000  | 1.70090000  |
| Zr | 1.77030000  | -0.02330000 | -0.48410000 |
| Zr | -1.74220000 | 0.02270000  | -0.53120000 |
| Zr | -4.53380000 | 0.02660000  | 1.65830000  |
| Zr | 4.73520000  | -3.51920000 | 0.91950000  |
| Zr | 1.92350000  | -3.43450000 | -1.41070000 |
| Zr | -1.81120000 | -3.40320000 | -1.42740000 |
| Zr | -4.73880000 | -3.50800000 | 0.74400000  |
| O  | 4.02120000  | 2.83220000  | -1.21390000 |
| O  | -0.05860000 | 2.83450000  | -2.45000000 |
| O  | -3.96350000 | 2.76830000  | -0.98370000 |
| O  | 3.92090000  | 0.18660000  | -0.43160000 |
| O  | 0.02330000  | -0.18830000 | -1.73220000 |
| O  | -3.89590000 | -0.21130000 | -0.45790000 |
| O  | 3.99200000  | -2.75280000 | -0.94850000 |
| O  | 0.02130000  | -2.87640000 | -2.54470000 |
| O  | -4.06220000 | -2.88750000 | -1.19720000 |

|   |             |             |             |
|---|-------------|-------------|-------------|
| O | 2.84010000  | 4.50520000  | 0.19290000  |
| O | -0.02060000 | 4.49440000  | -0.63890000 |
| O | -2.95020000 | 4.56850000  | 0.21820000  |
| O | 2.45000000  | -0.22760000 | 1.64930000  |
| O | 0.00700000  | -0.05820000 | 0.74070000  |
| O | -2.44710000 | 0.29640000  | 1.58860000  |
| O | 2.93280000  | -4.55650000 | 0.21340000  |
| O | 0.03120000  | -4.40060000 | -0.62350000 |
| O | -2.86630000 | -4.53760000 | 0.19410000  |
| O | 5.87400000  | 1.64550000  | 0.97750000  |
| O | 2.15110000  | 1.37870000  | -2.21470000 |
| O | -2.18200000 | 1.40570000  | -2.22200000 |
| O | -5.82500000 | 1.52530000  | 0.75470000  |
| O | 5.81720000  | -1.52370000 | 0.82970000  |
| O | 2.23990000  | -1.41910000 | -2.21790000 |
| O | -2.23250000 | -1.42890000 | -2.24850000 |
| O | -5.87250000 | -1.62960000 | 0.97660000  |
| O | 3.62010000  | 2.09480000  | 1.92960000  |
| O | 1.57610000  | 2.03090000  | 0.23200000  |
| O | -1.23320000 | 2.07200000  | 0.05940000  |
| O | -4.03920000 | 2.12340000  | 2.32400000  |
| O | 4.01140000  | -2.08960000 | 2.39180000  |
| O | 1.34440000  | -2.08680000 | 0.10540000  |
| O | -1.62390000 | -2.03810000 | 0.19310000  |
| O | -3.61370000 | -2.05950000 | 1.93340000  |
| H | 4.52800000  | 3.02380000  | -2.01180000 |
| H | -0.23830000 | 1.92030000  | -2.71780000 |
| H | -4.16530000 | 1.84100000  | -1.17780000 |
| H | 4.13710000  | 0.99810000  | -0.94240000 |
| H | 0.13560000  | -0.99980000 | -2.26930000 |
| H | -4.12340000 | -1.01800000 | -0.96670000 |
| H | 4.17660000  | -1.80780000 | -1.07300000 |
| H | 0.08380000  | -3.20540000 | -3.45040000 |
| H | -4.56460000 | -3.08430000 | -1.99600000 |
| H | 2.31200000  | 4.90370000  | 0.89510000  |
| H | 0.02040000  | 5.45560000  | -0.71220000 |
| H | -2.50730000 | 5.13910000  | 0.85610000  |
| H | 2.23550000  | -1.13060000 | 1.93170000  |
| H | 0.01500000  | 0.27880000  | 1.64070000  |
| H | -2.25930000 | 1.21600000  | 1.83470000  |
| H | 2.63160000  | -5.34990000 | 0.66820000  |
| H | 0.04680000  | -4.68840000 | 0.29700000  |
| H | -2.41850000 | -5.06040000 | 0.86860000  |
| H | 6.66480000  | 1.52180000  | 0.44010000  |

|   |             |             |             |
|---|-------------|-------------|-------------|
| H | 1.59270000  | 1.05100000  | -2.92940000 |
| H | -2.92530000 | 1.17860000  | -2.79170000 |
| H | -6.34320000 | 1.36550000  | -0.04330000 |
| H | 6.40760000  | -1.36640000 | 0.08380000  |
| H | 3.04320000  | -1.21270000 | -2.70840000 |
| H | -1.71280000 | -1.18710000 | -3.02340000 |
| H | -6.66610000 | -1.51100000 | 0.44250000  |
| H | 3.49270000  | 2.31710000  | 2.86000000  |
| H | 2.12580000  | 2.12720000  | 1.04620000  |
| H | -0.31540000 | 2.14180000  | 0.38500000  |
| H | -4.18810000 | 2.38940000  | 3.24090000  |
| H | 4.21510000  | -2.29990000 | 3.31260000  |
| H | 0.44520000  | -2.07530000 | 0.48030000  |
| H | -2.13410000 | -2.09050000 | 1.03520000  |
| H | -3.48190000 | -2.26800000 | 2.86670000  |
| O | 6.28160000  | 4.30730000  | -0.29260000 |
| O | 2.39000000  | 4.72400000  | -2.75720000 |
| O | -2.21550000 | 4.68310000  | -2.92510000 |
| O | -6.38430000 | 4.37050000  | 0.08930000  |
| O | 5.21680000  | 0.26860000  | 3.54950000  |
| O | -5.20870000 | -0.22050000 | 3.51160000  |
| O | 6.32210000  | -4.37020000 | 0.06180000  |
| O | 2.35440000  | -4.62860000 | -2.90600000 |
| O | -2.38480000 | -4.64900000 | -2.85440000 |
| O | -6.32400000 | -4.34090000 | -0.12820000 |
| H | 7.07900000  | 4.71970000  | 0.05370000  |
| H | 3.09340000  | 5.37640000  | -2.67200000 |
| H | -1.63380000 | 4.87450000  | -3.66870000 |
| H | -7.25560000 | 4.56550000  | 0.44720000  |
| H | 5.81030000  | 0.95400000  | 3.87470000  |
| H | -5.77370000 | -0.93010000 | 3.83610000  |
| H | 6.49150000  | -4.28170000 | -0.88330000 |
| H | 2.45310000  | -5.35630000 | -3.52110000 |
| H | -3.03070000 | -5.34620000 | -2.99610000 |
| H | -7.14990000 | -4.68290000 | 0.22670000  |
| O | 4.92520000  | 4.66680000  | 2.30970000  |
| O | -4.78180000 | 4.70880000  | 2.50090000  |
| O | 4.85250000  | -4.79760000 | 2.45470000  |
| O | -4.83900000 | -4.61160000 | 2.40270000  |
| H | 5.02580000  | 5.60120000  | 2.50980000  |
| H | -5.13840000 | 5.60370000  | 2.50690000  |
| H | 5.39920000  | -5.59130000 | 2.42740000  |
| H | -5.05160000 | -5.53110000 | 2.58540000  |

### Supplementary References:

1. M. J. Frisch, G. W. Trucks, H. B. Schlegel, G. E. Scuseria, M. A. Robb, J. R. Cheeseman, G. Scalmani, V. Barone, B. Mennucci, G. A. Petersson, H. Nakatsuji, M. Caricato, X. Li, H. P. Hratchian, A. F. Izmaylov, J. Bloino, G. Zheng, J. L. Sonnenberg, M. Hada, M. Ehara, K. Toyota, R. Fukuda, J. Hasegawa, M. Ishida, T. Nakajima, Y. Honda, O. Kitao, H. Nakai, T. Vreven, J. J. A. Montgomery, J. E. Peralta, F. Ogliaro, M. Bearpark, J. J. Heyd, E. Brothers, K. N. Kudin, V. N. Staroverov, T. Keith, R. Kobayashi, J. Normand, K. Raghavachari, A. Rendell, J. C. Burant, S. S. Iyengar, J. Tomasi, M. Cossi, N. Rega, J. M. Millam, M. Klene, J. E. Knox, J. B. Cross, V. Bakken, C. Adamo, J. Jaramillo, R. Gomperts, R. E. Stratmann, O. Yazyev, A. J. Austin, R. Cammi, C. Pomelli, J. W. Ochterski, R. L. Martin, K. Morokuma, V. G. Zakrzewski, G. A. Voth, P. Salvador, J. J. Dannenberg, S. Dapprich, A. D. Daniels, O. Farkas, J. B. Foresman, J. V. Ortiz, J. Cioslowski and D. J. Fox, D. J. Gaussian 09, Revision D.01; Gaussian, Inc.: Wallingford, CT, 2013.
2. P.J. Stephens, F.J. Devlin, C.F. Chabalowski, M.J. Frisch, Ab initio calculation of vibrational absorption and circular dichroism spectra using density functional force fields, *J. Phys. Chem.*, 1994, 98, 11623-11627.
3. S. Grimme, J. Antony, S. Ehrlich, H. Krieg, A consistent and accurate ab initio parametrization of density functional dispersion correction (DFT-D) for the 94 elements H-Pu, *J. Chem. Phys.*, 2010, 132, 154104.
4. W.J. Hehre, R. Ditchfield, J.A. Pople, Self—Consistent molecular orbital methods. XII. further extensions of gaussian—type basis sets for use in molecular orbital studies of organic molecules, *J. Chem. Phys.*, 1972, 56, 2257-2261.
5. P.J. Hay, W.R. Wadt, Ab initio effective core potentials for molecular calculations. Potentials for the transition metal atoms Sc to Hg, *J. Chem. Phys.*, 1985, 82, 270-283.
6. H.B. Schlegel, Optimization of equilibrium geometries and transition structures, *J. Comput. Chem.*, 1982, 3, 214-218.
